# Supplementary material
Source: ML conference proceedings conference paper supplement (https://proceedings.neurips.cc/paper_files/paper/2018/hash/26e359e83860db1d11b6acca57d8ea88-Abstract.html)
Supplement: Supplementary file [file 26e359e83860db1d11b6acca57d8ea88-Supplemental.zip]

---

# Are ResNets Provably Better than Linear Predictors?

---

**Ohad Shamir**

Department of Computer Science and Applied Mathematics  
Weizmann Institute of Science  
Rehovot, Israel  
ohad.shamir@weizmann.ac.il

## Abstract

A residual network (or ResNet) is a standard deep neural net architecture, with state-of-the-art performance across numerous applications. The main premise of ResNets is that they allow the training of each layer to focus on fitting just the residual of the previous layer’s output and the target output. Thus, we should expect that the trained network is no worse than what we can obtain if we remove the residual layers and train a shallower network instead. However, due to the non-convexity of the optimization problem, it is not at all clear that ResNets indeed achieve this behavior, rather than getting stuck at some arbitrarily poor local minimum. In this paper, we rigorously prove that arbitrarily deep, nonlinear residual units indeed exhibit this behavior, in the sense that the optimization landscape contains no local minima with value above what can be obtained with a linear predictor (namely a 1-layer network). Notably, we show this under minimal or no assumptions on the precise network architecture, data distribution, or loss function used. We also provide a quantitative analysis of approximate stationary points for this problem. Finally, we show that with a certain tweak to the architecture, training the network with standard stochastic gradient descent achieves an objective value close or better than any linear predictor.

## 1 Introduction

Residual networks (or ResNets) are a popular class of artificial neural networks, providing state-of-the-art performance across numerous applications [He et al., 2016a,b, Kim et al., 2016, Xie et al., 2017, Xiong et al., 2017]. Unlike vanilla feedforward neural networks, ResNets are characterized by skip connections, in which the output of one layer is directly added to the output of some following layer. Mathematically, whereas feedforward neural networks can be expressed as stacking layers of the form

$$\mathbf{y} = g_{\Phi}(\mathbf{x}) ,$$

(where  $(\mathbf{x}, \mathbf{y})$  is the input-output pair and  $\Phi$  are the tunable parameters of the function  $g_{\Phi}$ ), ResNets are built from “residual units” of the form  $\mathbf{y} = f(h(\mathbf{x}) + g_{\Phi}(\mathbf{x}))$ , where  $f, h$  are fixed functions. In fact, it is common to let  $f, h$  be the identity [He et al., 2016b], in which case each unit takes the form

$$\mathbf{y} = \mathbf{x} + g_{\Phi}(\mathbf{x}) . \tag{1}$$

Intuitively, this means that in each layer, the training of  $f_{\Phi}$  can focus on fitting just the “residual” of the target  $\mathbf{y}$  given  $\mathbf{x}$ , rather than  $\mathbf{y}$  itself. In particular, adding more depth should not harm performance, since we can effectively eliminate layers by tuning  $\Phi$  such that  $g_{\Phi}$  is the zero function. Due to this property, residual networks have proven to be very effective in training extremely deep networks, with hundreds of layers or more.

Despite their widespread empirical success, our rigorous theoretical understanding of training residual networks is very limited. Most recent theoretical works on optimization in deep learning (e.g.

Soltanolkotabi et al. [2017], Yun et al. [2018], Soudry and Hoffer [2017], Brutzkus et al. [2017], Ge et al. [2017], Safran and Shamir [2017], Du and Lee [2018] to name just a few examples) have focused on simpler, feedforward architectures, which do not capture the properties of residual networks. Some recent results do consider residual-like elements (see discussion of related work below), but generally do not apply to standard architectures. In particular, we are not aware of any theoretical justification for the basic premise of ResNets: Namely, that their architecture allows adding layers without harming performance. The problem is that training neural networks involves solving a highly non-convex problem using local search procedures. Thus, even though deeper residual networks can *express* shallower ones, it is not at all clear that the training process will indeed converge to such a network (or a better one). Perhaps, when we attempt to train the residual network using gradient-based methods, we might hit some poor local minimum, with a worse error than what can be obtained with a shallower network? This question is the main motivation to our work.

A secondary motivation are several recent results (e.g. Yun et al. [2018], Safran and Shamir [2017], Du et al. [2017], Liang et al. [2018]), which demonstrate how spurious local minima (with value larger than the global minima) do exist in general when training neural networks, even under fairly strong assumptions. Thus, instead of aiming for a result demonstrating that no such minima exist, which might be too good to be true on realistic networks, we can perhaps consider a more modest goal, showing that no such minima exist above a certain (non-trivial) level set. This level set can correspond, for instance, to the optimal value attainable by shallower networks, without the additional residual layers.

In this paper, we study these questions by considering the competitiveness of a simple residual network (composed of an arbitrarily deep, nonlinear residual unit and a linear output layer) with respect to linear predictors (or equivalently, 1-layer networks). Specifically, we consider the optimization problem associated with training such a residual network, which is in general non-convex and can have a complicated structure. Nevertheless, we prove that the optimization landscape has no local minima *with a value higher* than what can be achieved with a linear predictor on the same data. In other words, if we run a local search procedure and reach a local minimum, we are assured that the solution is no worse than the best obtainable with a linear predictor. Importantly, we show this under fairly minimal assumptions on the residual unit, no assumptions on the data distribution (such as linear separability), and no assumption on the loss function used besides smoothness and convexity in the network’s output (which is satisfied for losses used in practice). In addition, we provide a quantitative analysis, which shows how every point which is  $\epsilon$ -close to being stationary in certain directions (see Sec. 2 for a precise definition) can’t be more than  $\text{poly}(\epsilon)$  worse than any fixed linear predictor.

The results above are geometric in nature. As we explain later on, they do not necessarily imply that standard gradient-based methods will indeed converge to such desirable solutions (for example, since the iterates might diverge). Nevertheless, we also provide an algorithmic result, showing that if the residual architecture is changed a bit, then a standard stochastic gradient descent (SGD) procedure will result in a predictor similar or better than the best linear predictor. This result relies on a simple, but perhaps unexpected reduction to the setting of online learning, and might be of independent interest.

The supplementary material to this paper contains most proofs (Appendix A) and a discussion of how some of our results can be generalized to vector-valued outputs (Appendix B).

## Related Work

As far as we know, existing rigorous theoretical results on residual networks all pertain to linear networks, which combine linear residual units of the form

$$\mathbf{y} = \mathbf{x} + W\mathbf{x} = (I + W)\mathbf{x}.$$

Although such networks are not used in practice, they capture important aspects of the non-convexity associated with training residual networks. In particular, Hardt and Ma [2016] showed that linear residual networks with the squared loss have no spurious local minima (namely, every local minimum is also a global one). More recently, Bartlett et al. [2018] proved convergence results for gradient descent on such problems, assuming the inputs are isotropic and the target linear mapping is symmetric and positive definite. Showing similar results for non-linear networks is mentioned in Hardt and Ma [2016] as a major open problem. In our paper, we focus on non-linear residual units, but consider only local minima above some level set.

In terms of the setting, perhaps the work closest to ours is Liang et al. [2018], which considers networks which can be written as  $\mathbf{x} \mapsto f_S(\mathbf{x}) + f_D(\mathbf{x})$ , where  $f_S$  is a one-hidden-layer network, and  $f_D$  is an arbitrary, possibly deeper network. Under technical assumptions on the data distribution, activations used, network size, and assuming certain classification losses, the authors prove that the training objective is benign, in the sense that the network corresponding to any local minimum has zero classification error. However, as the authors point out, their architecture is different than standard ResNets (which would require a final tunable layer to combine the outputs of  $f_S, f_D$ ), and their results provably do not hold under such an architecture. Moreover, the technical assumptions are non-trivial, do not apply as-is to standard activations and losses (such as the ReLU activation and the logistic loss), and require specific conditions on the data, such as linear separability or a certain low-rank structure. In contrast, we study a more standard residual unit, and make minimal or no assumptions on the network, data distribution, and loss used. On the flip side, we only prove results for local minima above a certain level set, rather than all such points.

Finally, the idea of studying stationary points in non-convex optimization problems, which are above or below some reference level set, has also been explored in some other works (e.g. Ge and Ma [2017]), but under settings quite different than ours.

## 2 Setting and Preliminaries

We start with a few words about basic notation and terminology. We generally use bold-faced letters to denote vectors (assumed to be in column form), and capital letters to denote matrices or functions.  $\|\cdot\|$  refers to the Euclidean norm for vectors and spectral norm for matrices, unless specified otherwise.  $\|\cdot\|_{Fr}$  for matrices denotes the Frobenius norm (which always upper bounds the spectral norm). For a matrix  $M$ ,  $\text{vec}(M)$  refers to the entries of  $M$  written as one long vector (according to some canonical order). Given a function  $g$  on Euclidean space,  $\nabla g$  denotes its gradient and  $\nabla^2 g$  denotes its Hessian. A point  $\mathbf{x}$  in the domain of a function  $g$  is a local minimum, if  $g(\mathbf{x}) \leq g(\mathbf{x}')$  for any  $\mathbf{x}'$  in some open neighborhood of  $\mathbf{x}$ . Finally, we use standard  $\mathcal{O}(\cdot)$  and  $\Theta(\cdot)$  notation to hide constants, and let  $\text{poly}(\mathbf{x}_1, \dots, \mathbf{x}_r)$  refer to an expression which is polynomial in  $\mathbf{x}_1, \dots, \mathbf{x}_r$ .

We consider a residual network architecture, consisting of a residual unit as in Eq. (1), composed with a linear output layer, with scalar output<sup>1</sup>:

$$\mathbf{x} \mapsto \mathbf{w}^\top (\mathbf{x} + g_\Phi(\mathbf{x})).$$

We will make no assumptions on the structure of each  $g_\Phi$ , nor on the overall depth of the network which computes it, except that its last layer is a tunable linear transformation (namely, that  $g_\Phi(\mathbf{x}) = V f_\theta(\mathbf{x})$  for some matrix  $V$ , not necessarily a square one, and parameters  $\theta$ ). This condition follows the “full pre-activation” structure proposed in He et al. [2016b], which was empirically found to be the best-performing residual unit architecture, and is commonly used in practice (e.g. in TensorFlow). We depart from that structure only in that  $V$  is fully tunable rather than a convolution, to facilitate and simplify our theoretical study. Under this assumption, we have that given  $\mathbf{x}$ , the network outputs

$$\mathbf{x} \mapsto \mathbf{w}^\top (\mathbf{x} + V f_\theta(\mathbf{x})),$$

parameterized by a vector  $\mathbf{w}$ , a matrix  $V$ , and with some (possibly complicated) function  $f_\theta$  parameterized by  $\theta$ .

**Remark 1 (Biases).** *We note that this model can easily incorporate biases, namely predictors of the form  $\mathbf{x} \mapsto \mathbf{w}^\top (\mathbf{x} + V f_\theta(\mathbf{x}) + \mathbf{a}) + a$  for some tunable  $a, \mathbf{a}$ , by the standard trick of augmenting  $\mathbf{x}$  with an additional coordinate whose value is always 1, and assuming that  $f_\theta(\mathbf{x})$  outputs a vector with an additional coordinate of value 1. Since our results do not depend on the data geometry or specifics of  $f_\theta$ , they would not be affected by such modifications.*

We assume that our network is trained with respect to some data distribution (e.g. an average over some training set  $\{\mathbf{x}_i, y_i\}$ ), using a loss function  $\ell(p, y)$ , where  $p$  is the network’s prediction and  $y$  is the target value. Thus, we consider the optimization problem

$$\min_{\mathbf{w}, V, \theta} F(\mathbf{w}, V, \theta) := \mathbb{E}_{\mathbf{x}, y} [\ell(\mathbf{w}^\top (\mathbf{x} + V f_\theta(\mathbf{x})); y)] , \quad (2)$$

<sup>1</sup>See Appendix B for a discussion of how some of our results can be generalized to networks with vector-valued outputs.

where  $\mathbf{w}, V, \theta$  are unconstrained. This objective will be the main focus of our paper. In general, this objective is not convex in  $(\mathbf{w}, V, \theta)$ , and can easily have spurious local minima and saddle points.

In our results, we will make no explicit assumptions on the distribution of  $(\mathbf{x}, y)$ , nor on the structure of  $f_\theta$ . As to the loss, we will assume throughout the paper the following:

**Assumption 1.** *For any  $y$ , the loss  $\ell(p, y)$  is twice differentiable and convex in  $p$ .*

This assumption is mild, and is satisfied for standard losses such as the logistic loss, squared loss, smoothed hinge loss etc. Note that under this assumption,  $F(\mathbf{w}, V, \theta)$  is twice-differentiable with respect to  $\mathbf{w}, V$ , and in particular the function defined as

$$F_\theta(\mathbf{w}, V) := F(\mathbf{w}, V, \theta)$$

(for any fixed  $\theta$ ) is twice-differentiable. We emphasize that throughout the paper, we will *not* assume that  $F$  is necessarily differentiable with respect to  $\theta$  (indeed, if  $f_\theta$  represents a network with non-differentiable operators such as ReLU or the max function, we cannot expect that  $F$  will be differentiable everywhere). When considering derivatives of  $F_\theta$ , we think of the input as one long vector in Euclidean space (in order specified by  $\text{vec}()$ ), so  $\nabla F_\theta$  is a vector and  $\nabla^2 F_\theta$  is a matrix.

As discussed in the introduction, we wish to compare our objective value to that obtained by linear predictors. Specifically, we will use the notation

$$F_{lin}(\mathbf{w}) := F(\mathbf{w}, \mathbf{0}, \theta) = \mathbb{E}_{\mathbf{x}, y} [\ell(\mathbf{w}^\top \mathbf{x}; y)]$$

to denote the expected loss of a *linear* predictor parameterized by the vector  $\mathbf{w}$ . By Assumption 1, this function is convex and twice-differentiable.

Finally, we introduce the following class of points, which behave approximately like local minima of  $F$  with respect to  $(\mathbf{w}, V)$ , in terms of its first two derivatives:

**Definition 1** ( $\epsilon$ -SOPSP). *Let  $\mathcal{M}$  be an open subset of the domain of  $F(\mathbf{w}, V, \theta)$ , on which  $\nabla^2 F_\theta(\mathbf{w}, V)$  is  $\mu_2$ -Lipschitz in  $(\mathbf{w}, V)$ . Then  $(\mathbf{w}, V, \theta) \in \mathcal{M}$  is an  $\epsilon$ -second-order partial stationary point ( $\epsilon$ -SOPSP) of  $F$  on  $\mathcal{M}$ , if*

$$\|\nabla F_\theta(\mathbf{w}, V)\| \leq \epsilon \quad \text{and} \quad \lambda_{\min}(\nabla^2 F_\theta(\mathbf{w}, V)) \geq -\sqrt{\mu_2 \epsilon}.$$

Importantly, note that *any* local minimum  $(\mathbf{w}, V, \theta)$  of  $F$  must be a 0-SOPSP: This is because  $(\mathbf{w}, V)$  is a local minimum of the (differentiable) function  $F_\theta$ , hence  $\|\nabla F_\theta(\mathbf{w}, V)\| = 0$  and  $\lambda_{\min}(\nabla^2 F_\theta(\mathbf{w}, V)) \geq 0$ . Our definition above directly generalizes the well-known notion of  $\epsilon$ -second-order stationary points (or  $\epsilon$ -SOSP) [McCormick, 1977, Nesterov and Polyak, 2006, Jin et al., 2017], which are defined for functions which are twice-differentiable in all of their parameters. In fact, our definition of  $\epsilon$ -SOPSP is equivalent to requiring that  $(\mathbf{w}, V)$  is an  $\epsilon$ -SOSP of  $F_\theta$ . We need to use this more general definition, because we are not assuming that  $F$  is differentiable in  $\theta$ . Interestingly,  $\epsilon$ -SOSP is one of the most general classes of points in non-convex optimization, to which gradient-based methods can be shown to converge in  $\text{poly}(1/\epsilon)$  iterations.

### 3 Competitiveness with Linear Predictors

Our main results are Thm. 3 and Corollary 1 below, which are proven in two stages: First, we show that at any point such that  $\mathbf{w} \neq \mathbf{0}$ ,  $\|\nabla F_\theta(\mathbf{w}, V)\|$  is lower bounded in terms of the suboptimality with respect to the best linear predictor (Thm. 1). We then consider the case  $\mathbf{w} = \mathbf{0}$ , and show that for such points, if they are suboptimal with respect to the best linear predictor, then *either*  $\|\nabla F_\theta(\mathbf{w}, V)\|$  is strictly positive, *or*  $\lambda_{\min}(\nabla^2 F_\theta(\mathbf{w}, V))$  is strictly negative (Thm. 2). Thus, building on the definition of  $\epsilon$ -SOPSP from the previous section, we can show that no point which is suboptimal (compared to a linear predictor) can be a local minimum of  $F$ .

**Theorem 1.** *At any point  $(\mathbf{w}, V, \theta)$  such that  $\mathbf{w} \neq \mathbf{0}$ , and for any vector  $\mathbf{w}^*$  of the same dimension as  $\mathbf{w}$ ,*

$$\|\nabla F_\theta(\mathbf{w}, V)\| \geq \frac{F(\mathbf{w}, V, \theta) - F_{lin}(\mathbf{w}^*)}{\sqrt{2\|\mathbf{w}\|^2 + \|\mathbf{w}^*\|^2 \left(2 + \frac{\|V\|^2}{\|\mathbf{w}\|^2}\right)}}.$$

The theorem implies that for any point  $(\mathbf{w}, V, \theta)$  for which the objective value  $F(\mathbf{w}, V, \theta)$  is larger than that of some linear predictor  $F_{lin}(\mathbf{w}^*)$ , and unless  $\mathbf{w} = \mathbf{0}$ , its partial derivative with respect to  $(\mathbf{w}, V)$  (namely  $\nabla F_\theta(\mathbf{w}, V)$ ) is non-zero, so it cannot be a stationary point with respect to  $\mathbf{w}, V$ , nor a local minimum of  $F$ .

The proof of the theorem appears in the supplementary material, but relies on the following key lemma, which we shall state and roughly sketch its proof here:

**Lemma 1.** Fix some  $\mathbf{w}, V$  (where  $\mathbf{w} \neq \mathbf{0}$ ) and a vector  $\mathbf{w}^*$  of the same size as  $\mathbf{w}$ . Define the matrix

$$G = \left( \mathbf{w} - \mathbf{w}^* ; \frac{1}{\|\mathbf{w}\|^2} \mathbf{w}(\mathbf{w}^*)^\top V \right).$$

Then

$$\langle \text{vec}(G), \nabla F_\theta(\mathbf{w}, V) \rangle \geq F(\mathbf{w}, V, \theta) - F_{lin}(\mathbf{w}^*).$$

In other words, the inner product of the gradient with some carefully-chosen vector is lower bounded by the suboptimality of  $F(\mathbf{w}, V, \theta)$  compared to a linear predictor (and in particular, if the point is suboptimal, the gradient cannot be zero).

*Proof Sketch of Lemma 1.* We have

$$\begin{aligned} \langle \text{vec}(G), \nabla F_\theta(\mathbf{w}, V) \rangle &= \left\langle \mathbf{w} - \mathbf{w}^*, \frac{\partial}{\partial \mathbf{w}} F(\mathbf{w}, V, \theta) \right\rangle \\ &\quad + \left\langle \text{vec} \left( \frac{1}{\|\mathbf{w}\|^2} \mathbf{w}(\mathbf{w}^*)^\top V \right), \text{vec} \left( \frac{\partial}{\partial V} F(\mathbf{w}, V, \theta) \right) \right\rangle. \end{aligned}$$

Let  $d_\ell = \frac{\partial}{\partial p} \ell(p; y)|_{p=\mathbf{w}^\top(\mathbf{x}+Vf_\theta(\mathbf{x}))}$ . A careful technical calculation reveals that the expression above equals

$$\mathbb{E}_{\mathbf{x}, y} [d_\ell (\mathbf{w}^*)^\top V f_\theta(\mathbf{x})] + \mathbb{E}_{\mathbf{x}, y} [d_\ell (\mathbf{w} - \mathbf{w}^*)^\top (\mathbf{x} + V f_\theta(\mathbf{x}))].$$

This in turn equals

$$\mathbb{E}_{\mathbf{x}, y} [d_\ell (\mathbf{w}^\top (\mathbf{x} + V f_\theta(\mathbf{x})) - (\mathbf{w}^*)^\top \mathbf{x})].$$

Recalling the definition of  $d_\ell$ , and noting that by convexity of  $\ell$ ,  $\frac{\partial}{\partial p} \ell(p; y)(p - \tilde{p}) \geq \ell(p; y) - \ell(\tilde{p}; y)$  for all  $p, \tilde{p}$ , it follows that the above is lower bounded by

$$\mathbb{E}_{\mathbf{x}, y} [\ell(\mathbf{w}^\top (\mathbf{x} + V f_\theta(\mathbf{x}); y)) - \ell((\mathbf{w}^*)^\top \mathbf{x}; y)] = F(\mathbf{w}, V, \theta) - F_{lin}(\mathbf{w}^*).$$

□

To analyze the case  $\mathbf{w} = \mathbf{0}$ , we have the following result:

**Theorem 2.** For any  $V, \theta, \mathbf{w}^*$ ,

$$\lambda_{\min} (\nabla^2 F_\theta(\mathbf{0}, V)) \leq 0$$

and

$$\begin{aligned} \|\nabla F_\theta(\mathbf{0}, V)\| + \|V\| \sqrt{|\lambda_{\min} (\nabla^2 F_\theta(\mathbf{0}, V))| \cdot \left\| \frac{\partial^2}{\partial \mathbf{w}^2} F_\theta(\mathbf{0}, V) \right\| + \lambda_{\min} (\nabla^2 F_\theta(\mathbf{0}, V))^2} \\ \geq \frac{F(\mathbf{0}, V, \theta) - F_{lin}(\mathbf{w}^*)}{\|\mathbf{w}^*\|}, \end{aligned}$$

where  $\lambda_{\min}(M)$  denotes the minimal eigenvalue of a symmetric matrix  $M$ .

Combining the two theorems above, we can show the following main result:

**Theorem 3.** Fix some positive  $b, r, \mu_0, \mu_1, \mu_2$  and  $\epsilon \geq 0$ , and suppose  $\mathcal{M}$  is some convex open subset of the domain of  $F(\mathbf{w}, V, \theta)$  in which

- $\max\{\|\mathbf{w}\|, \|V\|\} \leq b$
- $F_\theta(\mathbf{w}, V)$ ,  $\nabla F_\theta(\mathbf{w}, V)$  and  $\nabla^2 F_\theta(\mathbf{w}, V)$  are  $\mu_0$ -Lipschitz,  $\mu_1$ -Lipschitz, and  $\mu_2$ -Lipschitz in  $(\mathbf{w}, V)$  respectively.

- For any  $(\mathbf{w}, V, \theta) \in \mathcal{W}$ , we have  $(\mathbf{0}, V, \theta) \in \mathcal{W}$  and  $\|\nabla^2 F_\theta(\mathbf{0}, V)\| \leq \mu_1$ .

Then for any  $(\mathbf{w}, V, \theta) \in \mathcal{M}$  which is an  $\epsilon$ -SOPSP of  $F$  on  $\mathcal{M}$ ,

$$F(\mathbf{w}, V, \theta) \leq \min_{\mathbf{w}: \|\mathbf{w}\| \leq r} F_{lin}(\mathbf{w}) + (\epsilon + \sqrt[4]{\epsilon}) \cdot \text{poly}(b, r, \mu_0, \mu_1, \mu_2).$$

We note that the  $\text{poly}(b, r, \mu_0, \mu_1, \mu_2)$  term hides only dependencies which are at most linear in the individual factors (see the proof in the supplementary material for the exact expression).

As discussed in Sec. 2, any local minima of  $F$  must correspond to a 0-SOPSP. Hence, the theorem above implies that for such a point,  $F(\mathbf{w}, V, \theta) \leq \min_{\mathbf{w}: \|\mathbf{w}\| \leq r} F_{lin}(\mathbf{w})$  (as long as  $F$  satisfies the Lipschitz continuity assumptions for some finite  $\mu_0, \mu_1, \mu_2$  on any bounded subset of the domain). Since this holds for any  $r$ , we have arrived at the following corollary:

**Corollary 1.** *Suppose that on any bounded subset of the domain of  $F$ , it holds that  $F_\theta(\mathbf{w}, V)$ ,  $\nabla F_\theta(\mathbf{w}, V)$  and  $\nabla^2 F_\theta(\mathbf{w}, V)$  are all Lipschitz continuous in  $(\mathbf{w}, V)$ . Then every local minimum  $(\mathbf{w}, V, \theta)$  of  $F$  satisfies*

$$F(\mathbf{w}, V, \theta) \leq \inf_{\mathbf{w}} F_{lin}(\mathbf{w}).$$

In other words, the objective  $F$  has no spurious local minima with value above the smallest attainable with a linear predictor.

**Remark 2** (Generalization to vector-valued outputs). *One can consider a generalization of our setting to networks with vector-valued outputs, namely  $\mathbf{x} \mapsto W(\mathbf{x} + V f_\theta(\mathbf{x}))$ , where  $W$  is a matrix, and with losses  $\ell(\mathbf{p}, \mathbf{y})$  taking vector-valued arguments and convex in  $\mathbf{p}$  (e.g. the cross-entropy loss). In this more general setting, it is possible to prove a variant of Thm. 1 using a similar proof technique (see Appendix B). However, it is not clear to us how to prove an analog of Thm. 2 and hence Thm. 3. We leave this as a question for future research.*

## 4 Effects of Norm and Regularization

Thm. 3 implies that any  $\epsilon$ -SOPSP must have a value not much worse than that obtained by a linear predictor. Moreover, as discussed in Sec. 2, such points are closely related to second-order stationary points, and gradient-based methods are known to converge quickly to such points (e.g. Jin et al. [2017]). Thus, it is tempting to claim that such methods will indeed result in a network competitive with linear predictors. Unfortunately, there is a fundamental catch: The bound of Thm. 3 depends on the norm of the point (via  $\|\mathbf{w}\|, \|V\|$ ), and can be arbitrarily bad if the norm is sufficiently large. In other words, Thm. 3 guarantees that a point which is  $\epsilon$ -SOPSP is only “good” as long as it is not too far away from the origin.

If the dynamics of the gradient method are such that the iterates remain in some bounded domain (or at least have a sufficiently slowly increasing norm), then this would not be an issue. However, we are not a-priori guaranteed that this would be the case: Since the optimization problem is unconstrained, and we are not assuming anything on the structure of  $f_\theta$ , it could be that the parameters  $\mathbf{w}, V$  diverge, and no meaningful algorithmic result can be derived from Thm. 3.

Of course, one option is that this dependence on  $\|\mathbf{w}\|, \|V\|$  is an artifact of the analysis, and any  $\epsilon$ -SOPSP of  $F$  is competitive with a linear predictor, regardless of the norms. However, the following example shows that this is not the case:

**Example 1.** *Fix some  $\epsilon > 0$ . Suppose  $\mathbf{x}, \mathbf{w}, V, \mathbf{w}^*$  are all scalars,  $\mathbf{w}^* = 1$ ,  $f_\theta(\mathbf{x}) = \epsilon \mathbf{x}$  (with no dependence on a parameter  $\theta$ ),  $\ell(p; y) = \frac{1}{2}(p - y)^2$  is the squared loss, and  $\mathbf{x} = y = 1$  w.p. 1. Then the objective can be equivalently written as*

$$F(w, v) = \frac{1}{2} (w(1 + \epsilon v) - 1)^2$$

(see leftmost plot in Figure 1). The gradient and Hessian of  $F(w, v)$  equal

$$\begin{pmatrix} (w - 1 + \epsilon w v)(1 + \epsilon v) \\ (w - 1 + \epsilon w v)\epsilon w \end{pmatrix} \quad \text{and} \quad \begin{pmatrix} (1 + \epsilon v)^2 & \epsilon(2w + 2\epsilon w v - 1) \\ \epsilon(2w + 2\epsilon w v - 1) & \epsilon^2 w^2 \end{pmatrix}$$

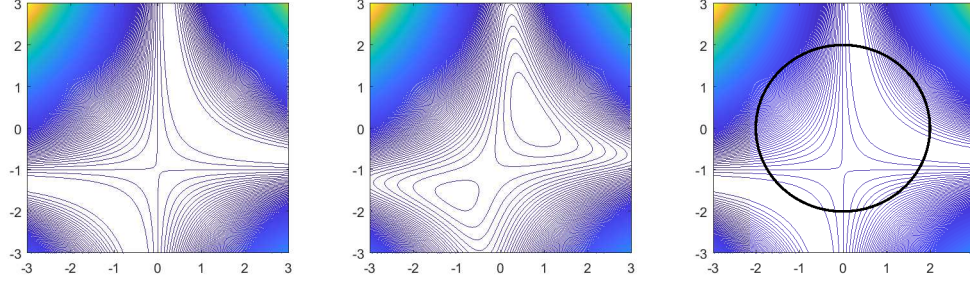

Figure 1: From left to right: Contour plots of (a)  $F(w, v) = (w(1+v)-1)^2$ , (b)  $F(w, v) + \frac{1}{4}(w^2 + v^2)$ , and (c)  $F(w, v)$  superimposed with the constraint  $\|(w, v)\| \leq 2$  (inside the circle). The  $x$ -axis corresponds to  $w$ , and the  $y$ -axis corresponds to  $v$ . Both (b) and (c) exhibit a spurious local minima in the bottom left quadrant of the domain. Best viewed in color.

respectively. In particular, at  $(w, v) = (0, -1/\epsilon)$ , the gradient is  $\mathbf{0}$  and the Hessian equals  $\begin{pmatrix} 0 & -\epsilon \\ -\epsilon & 0 \end{pmatrix}$ , which is arbitrarily close to  $\mathbf{0}$  if  $\epsilon$  is small enough. However, the objective value at that point equals

$$F\left(0, -\frac{1}{\epsilon}\right) = \frac{1}{2} > 0 = F_{lin}(1).$$

**Remark 3.** In the example above,  $F$  does not have gradients and Hessians with a uniformly bounded Lipschitz constant (over all of Euclidean space). However, for any  $\epsilon > 0$ , the Lipschitz constants are bounded by a numerical constant over  $(w, v) \in [-2/\epsilon, 2/\epsilon]^2$  (which includes the stationary point studied in the construction). This indicates that the problem indeed lies with the norm of  $(w, v)$  being unbounded, and not with the Lipschitz constants of the derivatives of  $F$ .

One standard approach to ensure that the iterates remain bounded is to add regularization, namely optimize

$$\min_{\mathbf{w}, V, \theta} F(\mathbf{w}, V, \theta) + R(\mathbf{w}, V, \theta),$$

where  $R$  is a regularization term penalizing large norms of  $\mathbf{w}, V, \theta$ . Unfortunately, not only does this alter the objective, it might also introduce new spurious local minima that did not exist in  $F(\mathbf{w}, V, \theta)$ . This is graphically illustrated in Figure 1, which plots  $F(w, v)$  from Example 1 (when  $\epsilon = 1$ ), with and without regularization of the form  $R(w, v) = \frac{\lambda}{2}(w^2 + v^2)$  where  $\lambda = 1/2$ . Whereas the stationary points of  $F(w, v)$  are either global minima (along two valleys, corresponding to  $\{(w, v) : w(1 + \epsilon v) = 1\}$ ) or a saddle point (at  $(w, v) = (1, -1/\epsilon)$ ), the regularization created a new spurious local minimum around  $(w, v) \approx (-1, -1.6)$ . Intuitively, this is because the regularization makes the objective value increase well before the valley of global minima of  $F$ . Other regularization choices can also lead to the same phenomenon. A similar issue can also occur if we impose a hard constraint, namely optimize

$$\min_{\mathbf{w}, V, \theta : (\mathbf{w}, V, \theta) \in \mathcal{M}} F(\mathbf{w}, V, \theta)$$

for some constrained domain  $\mathcal{M}$ . Again, as Figure 1 illustrates, this optimization problem can have spurious local minima inside its constrained domain, using the same  $F$  as before.

Of course, one way to fix this issue is by making the regularization parameter  $\lambda$  sufficiently small (or the domain  $\mathcal{M}$  sufficiently large), so that the regularization only comes into effect when  $\|(w, v)\|$  is sufficiently large. However, the correct choice of  $\lambda$  and  $\mathcal{M}$  depends on  $\epsilon$ , and here we run into a problem: If  $f_\theta$  is not simply some fixed  $\epsilon$  (as in the example above), but changes over time, then we have no a-priori guarantee on how  $\lambda$  or  $\mathcal{M}$  should be chosen. Thus, it is not clear that any fixed choice of regularization would work, and lead a gradient-based method to a good local minimum.

## 5 Success of SGD Assuming a Skip Connection to the Output

Having discussed the challenges of getting an algorithmic result in the previous section, we now show how such a result is possible, assuming the architecture of our network is changed a bit.

Concretely, instead of the network architecture  $\mathbf{x} \mapsto \mathbf{w}^\top (\mathbf{x} + V f_\theta(\mathbf{x}))$ , we consider the architecture

$$\mathbf{x} \mapsto \mathbf{w}^\top \mathbf{x} + \mathbf{v}^\top f_\theta(\mathbf{x}),$$

parameterized by vectors  $\mathbf{w}, \mathbf{v}$  and  $\theta$ , so our new objective can be written as

$$F(\mathbf{w}, \mathbf{v}, \theta) = \mathbb{E}_{\mathbf{x}, y} [\ell(\mathbf{w}^\top \mathbf{x} + \mathbf{v}^\top f_\theta(\mathbf{x}); y)].$$

This architecture corresponds to having a skip connection directly to the network's output, rather than to a final linear output layer. It is similar in spirit to the skip-connection studied in Liang et al. [2018], except that they had a two-layer nonlinear network instead of our linear  $\mathbf{w}^\top \mathbf{x}$  component.

In what follows, we consider a standard stochastic gradient descent (SGD) algorithm to train our network: Fixing a step size  $\eta$  and some convex parameter domain  $\mathcal{M}$ , we

1. Initialize  $(\mathbf{w}_1, \mathbf{v}_1, \theta_1)$  at some point in  $\mathcal{M}$
2. For  $t = 1, 2, \dots, T$ , we randomly sample a data point  $(\mathbf{x}_t, y_t)$  from the underlying data distribution, and perform

$$(\mathbf{w}_{t+1}, \mathbf{v}_{t+1}, \theta_{t+1}) = \Pi_{\mathcal{M}}((\mathbf{w}_t, \mathbf{v}_t, \theta_t) - \eta \nabla h_t(\mathbf{w}_t, \mathbf{v}_t, \theta_t)),$$

where

$$h_t(\mathbf{w}, \mathbf{v}, \theta) := \ell(\mathbf{w}^\top \mathbf{x}_t + \mathbf{v}^\top f_\theta(\mathbf{x}_t); y_t)$$

and  $\Pi_{\mathcal{M}}$  denote an Euclidean projection on the set  $\mathcal{M}$ .

Note that  $h_t(\mathbf{w}, \mathbf{v}, \theta)$  is always differentiable with respect to  $\mathbf{w}, \mathbf{v}$ , and in the above, we assume for simplicity that it is also differentiable with respect to  $\theta$  (if not, one can simply define  $\nabla h_t(\mathbf{w}, \mathbf{v}, \theta)$  above to be  $(\frac{\partial}{\partial \mathbf{w}} h_t(\mathbf{w}, \mathbf{v}, \theta), \frac{\partial}{\partial \mathbf{v}} h_t(\mathbf{w}, \mathbf{v}, \theta), \mathbf{r}_{t, \mathbf{w}, \mathbf{v}, \theta})$  for some arbitrary vector  $\mathbf{r}_{t, \mathbf{w}, \mathbf{v}, \theta}$ , and the result below can still be easily verified to hold).

As before, we use the notation

$$F_{lin}(\mathbf{w}) = \mathbb{E}_{\mathbf{x}, y} [\ell(\mathbf{w}^\top \mathbf{x}; y)]$$

to denote the expected loss of a linear predictor parameterized by  $\mathbf{w}$ . The following theorem establishes that under mild conditions, running stochastic gradient descent with sufficiently many iterations results in a network competitive with any fixed linear predictor:

**Theorem 4.** *Suppose the domain  $\mathcal{M}$  satisfies the following for some positive constants  $b, r, l$ :*

- $\mathcal{M} = \{(\mathbf{w}, \mathbf{v}, \theta) : (\mathbf{w}, \mathbf{v}) \in \mathcal{M}_1, \theta \in \mathcal{M}_2\}$  for some closed convex sets  $\mathcal{M}_1, \mathcal{M}_2$  in Euclidean spaces (namely,  $\mathcal{M}$  is a Cartesian product of  $\mathcal{M}_1, \mathcal{M}_2$ ).
- For any  $(\mathbf{x}, y)$  in the support of the data distribution, and any  $\theta \in \mathcal{M}_2$ ,  $\ell(\mathbf{w}^\top \mathbf{x} + \mathbf{v}^\top f_\theta(\mathbf{x}); y)$  is  $l$ -Lipschitz in  $(\mathbf{w}, \mathbf{v})$  over  $\mathcal{M}_1$ , and bounded in absolute value by  $r$ .
- For any  $(\mathbf{w}, \mathbf{v}) \in \mathcal{M}_1$ ,  $\sqrt{\|\mathbf{w}\|^2 + \|\mathbf{v}\|^2} \leq b$ .

*Suppose we perform  $T$  iterations of stochastic gradient descent as described above, with any step size  $\eta = \Theta(b/(l\sqrt{T}))$ . Then with probability at least  $1 - \delta$ , one of the iterates  $\{(\mathbf{w}_t, \mathbf{v}_t, \theta_t)\}_{t=1}^T$  satisfies*

$$F(\mathbf{w}_t, \mathbf{v}_t, \theta_t) \leq \min_{\mathbf{u}: (\mathbf{u}, \mathbf{0}) \in \mathcal{M}_1} F_{lin}(\mathbf{u}) + \mathcal{O}\left(\frac{bl + r\sqrt{\log(1/\delta)}}{\sqrt{T}}\right).$$

The proof relies on a technically straightforward – but perhaps unexpected – reduction to adversarial online learning, and appears in the supplementary material. Roughly speaking, the idea is that our stochastic gradient descent procedure over  $(\mathbf{w}, \mathbf{v}, \theta)$  is equivalent to online gradient descent on  $(\mathbf{w}, \mathbf{v})$ , with respect to a sequence of functions defined by the iterates  $\theta_1, \theta_2, \dots$ . Even though these iterates can change in unexpected and complicated ways, the strong guarantees of online learning (which allow the sequence of functions to be rather arbitrary) allow us to obtain the theorem above.

**Acknowledgements.** We thank the anonymous NIPS 2018 reviewers for their helpful comments. This research is supported in part by European Research Council (ERC) grant 754705.



## References

- Peter L Bartlett, David P Helmbold, and Philip M Long. Gradient descent with identity initialization efficiently learns positive definite linear transformations by deep residual networks. *arXiv preprint arXiv:1802.06093*, 2018.
- Alon Brutzkus, Amir Globerson, Eran Malach, and Shai Shalev-Shwartz. Sgd learns over-parameterized networks that provably generalize on linearly separable data. *arXiv preprint arXiv:1710.10174*, 2017.
- Simon S Du and Jason D Lee. On the power of over-parametrization in neural networks with quadratic activation. *arXiv preprint arXiv:1803.01206*, 2018.
- Simon S Du, Jason D Lee, Yuandong Tian, Barnabas Poczos, and Aarti Singh. Gradient descent learns one-hidden-layer cnn: Don’t be afraid of spurious local minima. *arXiv preprint arXiv:1712.00779*, 2017.
- Rong Ge and Tengyu Ma. On the optimization landscape of tensor decompositions. In *Advances in Neural Information Processing Systems*, pages 3656–3666, 2017.
- Rong Ge, Jason D Lee, and Tengyu Ma. Learning one-hidden-layer neural networks with landscape design. *arXiv preprint arXiv:1711.00501*, 2017.
- Moritz Hardt and Tengyu Ma. Identity matters in deep learning. *arXiv preprint arXiv:1611.04231*, 2016.
- Elad Hazan. Introduction to online convex optimization. *Foundations and Trends® in Optimization*, 2(3-4):157–325, 2016.
- Kaiming He, Xiangyu Zhang, Shaoqing Ren, and Jian Sun. Deep residual learning for image recognition. In *Proceedings of the IEEE conference on computer vision and pattern recognition*, pages 770–778, 2016a.
- Kaiming He, Xiangyu Zhang, Shaoqing Ren, and Jian Sun. Identity mappings in deep residual networks. In *European Conference on Computer Vision*, pages 630–645. Springer, 2016b.
- Chi Jin, Rong Ge, Praneeth Netrapalli, Sham M Kakade, and Michael I Jordan. How to escape saddle points efficiently. *arXiv preprint arXiv:1703.00887*, 2017.
- Jiwon Kim, Jung Kwon Lee, and Kyoung Mu Lee. Accurate image super-resolution using very deep convolutional networks. In *Proceedings of the IEEE Conference on Computer Vision and Pattern Recognition*, pages 1646–1654, 2016.
- Shiyu Liang, Ruoyu Sun, Yixuan Li, and R Srikant. Understanding the loss surface of neural networks for binary classification. *arXiv preprint arXiv:1803.00909*, 2018.
- Garth P McCormick. A modification of armijo’s step-size rule for negative curvature. *Mathematical Programming*, 13(1):111–115, 1977.
- Yurii Nesterov and Boris T Polyak. Cubic regularization of newton method and its global performance. *Mathematical Programming*, 108(1):177–205, 2006.
- Itay Safran and Ohad Shamir. Spurious local minima are common in two-layer relu neural networks. *arXiv preprint arXiv:1712.08968*, 2017.
- Shai Shalev-Shwartz. Online learning and online convex optimization. *Foundations and Trends® in Machine Learning*, 4(2):107–194, 2012.
- Mahdi Soltanolkotabi, Adel Javanmard, and Jason D Lee. Theoretical insights into the optimization landscape of over-parameterized shallow neural networks. *arXiv preprint arXiv:1707.04926*, 2017.
- Daniel Soudry and Elad Hoffer. Exponentially vanishing sub-optimal local minima in multilayer neural networks. *arXiv preprint arXiv:1702.05777*, 2017.

- Saining Xie, Ross Girshick, Piotr Dollár, Zhuowen Tu, and Kaiming He. Aggregated residual transformations for deep neural networks. In *Computer Vision and Pattern Recognition (CVPR), 2017 IEEE Conference on*, pages 5987–5995. IEEE, 2017.
- Wayne Xiong, Jasha Droppo, Xuedong Huang, Frank Seide, Mike Seltzer, Andreas Stolcke, Dong Yu, and Geoffrey Zweig. The microsoft 2016 conversational speech recognition system. In *Acoustics, Speech and Signal Processing (ICASSP), 2017 IEEE International Conference on*, pages 5255–5259. IEEE, 2017.
- Chulhee Yun, Suvrit Sra, and Ali Jadbabaie. A critical view of global optimality in deep learning. *arXiv preprint arXiv:1802.03487*, 2018.
- Martin Zinkevich. Online convex programming and generalized infinitesimal gradient ascent. In *Proceedings of the 20th International Conference on Machine Learning (ICML-03)*, pages 928–936, 2003.

## A Proofs

### A.1 Proof of Lemma 1

To simplify notation, let  $d_\ell = \frac{\partial}{\partial p} \ell(p; y)|_{p=\mathbf{w}^\top(\mathbf{x}+Vf_\theta(\mathbf{x}))}$ . It is easily verified that

$$\frac{\partial}{\partial \mathbf{w}} F(\mathbf{w}, V, \theta) = \mathbb{E}_{\mathbf{x}, y} [d_\ell(\mathbf{x} + Vf_\theta(\mathbf{x}))].$$

Therefore, we have

$$\left\langle \mathbf{w} - \mathbf{w}^*, \frac{\partial}{\partial \mathbf{w}} F(\mathbf{w}, V, \theta) \right\rangle = \mathbb{E}_{\mathbf{x}, y} [d_\ell(\mathbf{w} - \mathbf{w}^*)^\top (\mathbf{x} + Vf_\theta(\mathbf{x}))]. \quad (3)$$

Proceeding in a similar fashion, it is easily verified that

$$\frac{\partial}{\partial V} F(\mathbf{w}, V, \theta) = \mathbb{E}_{\mathbf{x}, y} [d_\ell \mathbf{w} f_\theta(\mathbf{x})^\top],$$

where we write the partial derivative in matrix form. As a result,

$$\begin{aligned} & \left\langle \text{vec} \left( \frac{1}{\|\mathbf{w}\|^2} \mathbf{w}(\mathbf{w}^*)^\top V \right), \text{vec} \left( \frac{\partial}{\partial V} F(\mathbf{w}, V, \theta) \right) \right\rangle \\ &= \text{trace} \left( \left( \frac{1}{\|\mathbf{w}\|^2} \mathbf{w}(\mathbf{w}^*)^\top V \right)^\top \frac{\partial}{\partial V} F(\mathbf{w}, V, \theta) \right) \\ &= \mathbb{E}_{\mathbf{x}, y} \left[ d_\ell \text{trace} \left( \left( \frac{1}{\|\mathbf{w}\|^2} V^\top \mathbf{w}^* \mathbf{w}^\top \right) \mathbf{w} f_\theta(\mathbf{x})^\top \right) \right] \\ &= \mathbb{E}_{\mathbf{x}, y} [d_\ell \text{trace} (V^\top \mathbf{w}^* f_\theta(\mathbf{x})^\top)] \\ &\stackrel{(*)}{=} \mathbb{E}_{\mathbf{x}, y} [d_\ell f_\theta(\mathbf{x})^\top V^\top \mathbf{w}^*] = \mathbb{E}_{\mathbf{x}, y} [d_\ell (\mathbf{w}^*)^\top V f_\theta(\mathbf{x})], \end{aligned} \quad (4)$$

where in  $(*)$  we used the fact that  $\text{trace}(ABC) = \text{trace}(CAB)$  for matrices  $A, B, C$  that agree in their dimensions.

Using Eq. (3), Eq. (4) and the definition of  $G$ , it follows that

$$\begin{aligned} & \langle \text{vec}(G), \nabla F_\theta(\mathbf{w}, V) \rangle \\ &= \left\langle \mathbf{w} - \mathbf{w}^*, \frac{\partial}{\partial \mathbf{w}} F(\mathbf{w}, V, \theta) \right\rangle \\ &+ \left\langle \text{vec} \left( \frac{1}{\|\mathbf{w}\|^2} \mathbf{w}(\mathbf{w}^*)^\top V \right), \text{vec} \left( \frac{\partial}{\partial V} F(\mathbf{w}, V, \theta) \right) \right\rangle \\ &= \mathbb{E}_{\mathbf{x}, y} [d_\ell (\mathbf{w}^*)^\top V f_\theta(\mathbf{x})] + \mathbb{E}_{\mathbf{x}, y} [d_\ell (\mathbf{w} - \mathbf{w}^*)^\top (\mathbf{x} + Vf_\theta(\mathbf{x}))] \\ &= \mathbb{E}_{\mathbf{x}, y} [d_\ell (\mathbf{w}^\top (\mathbf{x} + Vf_\theta(\mathbf{x})) - (\mathbf{w}^*)^\top \mathbf{x})]. \end{aligned} \quad (5)$$

Recalling that  $d_\ell$  is the derivative of  $\ell$  with respect to its first argument when it equals  $\mathbf{w}^\top(\mathbf{x} + Vf_\theta(\mathbf{x}))$ , and noting that by convexity of  $\ell$ ,  $\frac{\partial}{\partial p} \ell(p; y)(p - \tilde{p}) \geq \ell(p; y) - \ell(\tilde{p}; y)$  for all  $p, \tilde{p}$ , it follows that Eq. (5) is lower bounded by

$$\mathbb{E}_{\mathbf{x}, y} [\ell(\mathbf{w}^\top (\mathbf{x} + Vf_\theta(\mathbf{x})); y) - \ell((\mathbf{w}^*)^\top \mathbf{x}; y)] = F(\mathbf{w}, V, \theta) - F_{lin}(\mathbf{w}^*).$$

### A.2 Proof of Thm. 1

By Lemma 1 and Cauchy-Schwartz, we have

$$\|G\|_{Fr} \cdot \|\nabla F_\theta(\mathbf{w}, V)\| \geq \|G\| \cdot \|\nabla F_\theta(\mathbf{w}, V)\| \geq F(\mathbf{w}, V, \theta) - F_{lin}(\mathbf{w}^*).$$

(where  $\|\cdot\|_{Fr}$  denotes the Frobenius norm). Dividing both sides by  $\|G\|_{Fr}$ , and using the definition of  $G$ , we get that

$$\|\nabla F_\theta(\mathbf{w}, V)\| \geq \frac{F(\mathbf{w}, V, \theta) - F_{lin}(\mathbf{w}^*)}{\sqrt{\|\mathbf{w} - \mathbf{w}^*\|^2 + \left\| \frac{1}{\|\mathbf{w}\|^2} \mathbf{w}(\mathbf{w}^*)^\top V \right\|_{Fr}^2}}. \quad (6)$$

We now simplify this by upper bounding the denominator (note that this leaves the inequality valid regardless of the sign of  $F(\mathbf{w}, V, \theta) - F_{lin}(\mathbf{w}^*)$ , since if  $F(\mathbf{w}, V, \theta) - F_{lin}(\mathbf{w}^*) \geq 0$ , this would only decrease its right hand side, and if  $F(\mathbf{w}, V, \theta) - F_{lin}(\mathbf{w}^*) < 0$ , then the bound remains trivially true since  $\|\nabla F_\theta(\mathbf{w}, V)\| \geq 0 > \frac{F(\mathbf{w}, V, \theta) - F_{lin}(\mathbf{w}^*)}{\|\mathbf{w}\|^4}$  for any  $a > 0$ ). Specifically, using the facts<sup>2</sup> that  $\|AB\| \leq \|A\| \cdot \|B\|$ , and that  $\|AB\|_{Fr} \leq \|A\|_{Fr} \cdot \|B\|$ , we can upper bound the denominator by

$$\sqrt{\|\mathbf{w} - \mathbf{w}^*\|^2 + \frac{1}{\|\mathbf{w}\|^4} \cdot (\|\mathbf{w}\| \cdot \|\mathbf{w}^*\| \cdot \|V\|)^2}.$$

Simplifying the above, using the fact that  $\|\mathbf{w} - \mathbf{w}^*\|^2 \leq 2\|\mathbf{w}\|^2 + 2\|\mathbf{w}^*\|^2$  (as for any vectors  $\mathbf{x}, \mathbf{z}$ ,  $\|\mathbf{x} - \mathbf{z}\|^2 \leq \|\mathbf{x}\|^2 + \|\mathbf{z}\|^2 + 2\|\mathbf{x}\| \|\mathbf{z}\| \leq \|\mathbf{x}\|^2 + \|\mathbf{z}\|^2 + (\|\mathbf{x}\|^2 + \|\mathbf{z}\|^2) = 2(\mathbf{x}^2 + \mathbf{z}^2)$ ), and plugging into Eq. (6), the result follows.

### A.3 Proof of Thm. 2

We will need the following auxiliary lemma:

**Lemma 2.** *Let  $M$  be a symmetric real-valued square matrix of the form*

$$M = \begin{pmatrix} b & \mathbf{u}^\top \\ \mathbf{u} & \mathbf{0} \end{pmatrix},$$

where  $b$  is some scalar,  $\mathbf{u}$  is a vector, and all entries of  $M$  other than the first row and column are 0. Then the minimal eigenvalue  $\lambda_{\min}$  of  $M$  is non-positive, and satisfies

$$\|\mathbf{u}\|^2 = |b\lambda_{\min}| + \lambda_{\min}^2.$$

*Proof.* By definition, we have  $\lambda_{\min} = \min_{\mathbf{z}: \|\mathbf{z}\|=1} \mathbf{z}^\top M \mathbf{z}$ . Rewriting  $\mathbf{z}$  as  $(x; \mathbf{y})$  (where  $x$  is the first coordinate of  $\mathbf{z}$  and the vector  $\mathbf{y}$  represents the other coordinates) and plugging in, this is equivalent to  $\min_{x, \mathbf{y}: x^2 + \|\mathbf{y}\|^2 = 1} bx^2 + 2x\mathbf{u}^\top \mathbf{y}$ . Clearly, for any fixed  $x$ , this is minimized when we take  $\mathbf{y} = -a\mathbf{u}/\|\mathbf{u}\|$  (for some  $a \geq 0$  satisfying the constraints), so we equivalently have  $\lambda_{\min} = \min_{x, a: x^2 + a^2 = 1} bx^2 - 2\|\mathbf{u}\|xa$ . This is the same as the minimal eigenvalue of the  $2 \times 2$  matrix  $\begin{pmatrix} b & \|\mathbf{u}\| \\ \|\mathbf{u}\| & 0 \end{pmatrix}$ . By standard formulas for  $2 \times 2$  matrices, it follows that  $\lambda_{\min} = \frac{1}{2} \left( b - \sqrt{b^2 + 4\|\mathbf{u}\|^2} \right)$ . Solving for  $\|\mathbf{u}\|^2$  and noting that  $\lambda_{\min} < 0$ , the result follows.  $\square$

We now turn to prove the theorem. We will use the shorthand  $\ell'$  and  $\ell''$  to denote a derivative and second derivative (respectively) of  $\ell$  with respect to its first argument. Based on the calculations from earlier, we have

$$\frac{\partial}{\partial \mathbf{w}} F(\mathbf{w}, V, \theta) = \mathbb{E}_{\mathbf{x}, y} [\ell'(\mathbf{w}^\top (\mathbf{x} + Vf_\theta(\mathbf{x})); y) \cdot (\mathbf{x} + Vf_\theta(\mathbf{x}))]. \quad (7)$$

$$\frac{\partial}{\partial V} F(\mathbf{w}, V, \theta) = \mathbb{E}_{\mathbf{x}, y} [\ell'(\mathbf{w}^\top (\mathbf{x} + Vf_\theta(\mathbf{x})); y) \cdot \mathbf{w} f_\theta(\mathbf{x})^\top].$$

Therefore, for any indices  $i, j$ , we have

$$\frac{\partial^2}{\partial V_{i,j} \partial V} F(\mathbf{w}, V, \theta) = \mathbb{E}_{\mathbf{x}, y} [\ell''(\mathbf{w}^\top (\mathbf{x} + Vf_\theta(\mathbf{x})); y) \cdot (w_i(f_\theta(\mathbf{x}))_j) \cdot \mathbf{w} f_\theta(\mathbf{x})^\top]$$

this is 0 at  $\mathbf{w} = \mathbf{0}$ , hence

$$\frac{\partial^2}{\partial V^2} F(\mathbf{0}, V, \theta) = \mathbf{0}. \quad (8)$$

Also,

$$\begin{aligned} \frac{\partial^2}{\partial w_i \partial V} F(\mathbf{w}, V, \theta) &= \mathbb{E}_{\mathbf{x}, y} [\ell''(\mathbf{w}^\top (\mathbf{x} + Vf_\theta(\mathbf{x})); y) \cdot (\mathbf{x} + Vf_\theta(\mathbf{x}))_i \cdot \mathbf{w} f_\theta(\mathbf{x})^\top] \\ &\quad + \mathbb{E}_{\mathbf{x}, y} [\ell'(\mathbf{w}^\top (\mathbf{x} + Vf_\theta(\mathbf{x})); y) \cdot \mathbf{e}_i f_\theta(\mathbf{x})^\top], \end{aligned}$$

<sup>2</sup>The first assertion is standard. The second follows from  $\|AB\|_{Fr}^2 = \sum_i \|A_i B\|^2 \leq \sum_i (\|A_i\| \cdot \|B\|)^2 = \|B\|^2 \sum_i \|A_i\|^2 = \|A\|_{Fr}^2 \|B\|^2$ , where  $A_i$  is the  $i$ -th row of  $A$ .

where  $\mathbf{e}_i$  is the  $i$ -th standard basis vector. At  $\mathbf{w} = \mathbf{0}$ , this becomes

$$\frac{\partial^2}{\partial w_i \partial V} F(\mathbf{0}, V, \theta) = \mathbb{E}_{\mathbf{x}, y} [\ell'(0; y) \cdot \mathbf{e}_i f_\theta(\mathbf{x})^\top] = \mathbf{e}_i \mathbf{r}^\top, \quad (9)$$

where we define

$$\mathbf{r} = \mathbb{E}_{\mathbf{x}, y} [\ell'(0; y) f_\theta(\mathbf{x})]. \quad (10)$$

Combining Eq. (8) and Eq. (9), and recalling that  $\nabla^2 F_\theta(\mathbf{w}, V)$  is the matrix of second partial derivatives of  $F(\mathbf{w}, V, \theta)$  with respect to  $(\mathbf{w}, V)$  (viewed as one long vector), we get that

$$\nabla^2 F_\theta(\mathbf{0}, V) = \begin{pmatrix} \frac{\partial^2}{\partial \mathbf{w}^2} F_\theta(\mathbf{0}, V) & \mathbf{r}^\top & \mathbf{0} & \mathbf{0} \\ \mathbf{0} & \mathbf{r}^\top & \mathbf{0} & \dots \\ \mathbf{0} & \mathbf{0} & \mathbf{r}^\top & \\ \mathbf{r} & \mathbf{0} & \mathbf{0} & \vdots \\ \mathbf{0} & \mathbf{r} & \mathbf{0} & \dots \\ \mathbf{0} & \mathbf{0} & \mathbf{r} & \mathbf{0} \\ \dots & \dots & \dots & \dots \end{pmatrix}.$$

Let  $b$  denote the 1st element along the diagonal of  $\frac{\partial^2}{\partial \mathbf{w}^2} F_\theta(\mathbf{0}, V, \theta)$ , and define the matrix

$$M = \begin{pmatrix} b & \mathbf{r}^\top \\ \mathbf{r} & \mathbf{0} \end{pmatrix}.$$

This is a submatrix of  $\nabla^2 F_\theta(\mathbf{0}, V)$ , which by Lemma 2, has a minimal eigenvalue  $\lambda_{\min}(M) \leq 0$ , and

$$\|\mathbf{r}\|^2 = |b \lambda_{\min}(M)| + \lambda_{\min}(M)^2. \quad (11)$$

Since  $M$  is a submatrix of  $\nabla^2 F_\theta(\mathbf{0}, V)$ , we must also have

$$\lambda_{\min}(\nabla^2 F_\theta(\mathbf{0}, V)) \leq \lambda_{\min}(M) \leq 0$$

by the interlacing theorem (proving the first part of the theorem). Finally, since  $b$  is an element in the diagonal of  $\frac{\partial^2}{\partial \mathbf{w}^2} F_\theta(\mathbf{0}, V, \theta)$ , we also have  $b \leq \|\frac{\partial^2}{\partial \mathbf{w}^2} F_\theta(\mathbf{0}, V)\|$ . Plugging the above into Eq. (11), we get

$$\|\mathbf{r}\|^2 \leq |\lambda_{\min}(\nabla^2 F_\theta(\mathbf{0}, V))| \cdot \left\| \frac{\partial^2}{\partial \mathbf{w}^2} F_\theta(\mathbf{0}, V) \right\| + \lambda_{\min}(\nabla^2 F_\theta(\mathbf{0}, V))^2. \quad (12)$$

Leaving this equation aside for a moment, we observe that by Eq. (7) and the definition of  $\mathbf{r}$  from Eq. (10),

$$\begin{aligned} \frac{\partial}{\partial \mathbf{w}} F(\mathbf{0}, V, \theta) &= \mathbb{E}_{\mathbf{x}, y} [\ell'(0; y) \cdot (\mathbf{x} + V f_\theta(\mathbf{x}))] \\ &= \mathbb{E}_{\mathbf{x}, y} [\ell'(0; y) \mathbf{x}] + \mathbb{E}_{\mathbf{x}, y} [\ell'(0; y) V f_\theta(\mathbf{x})] = \nabla F_{lin}(\mathbf{0}) + V \mathbf{r}, \end{aligned}$$

where we recall that  $F_{lin}(\mathbf{w}) = F(\mathbf{w}, \mathbf{0}, \theta) = \mathbb{E}_{\mathbf{x}, y} [\ell(\mathbf{w}^\top \mathbf{x}; y)]$ . In particular, this implies (by the triangle inequality and Cauchy-Schwartz) that

$$\left\| \frac{\partial}{\partial \mathbf{w}} F(\mathbf{0}, V, \theta) \right\| + \|V\| \cdot \|\mathbf{r}\| \geq \|\nabla F_{lin}(\mathbf{0})\|,$$

and since  $\frac{\partial}{\partial \mathbf{w}} F(\mathbf{0}, V, \theta)$  is a sub-vector of  $\nabla F_\theta(\mathbf{0}, V)$ , it follows that

$$\|\nabla F_\theta(\mathbf{0}, V)\| + \|V\| \cdot \|\mathbf{r}\| \geq \|\nabla F_{lin}(\mathbf{0})\|. \quad (13)$$

Fixing some  $\mathbf{w}^*$ , we have by convexity of  $F_{lin}$  that  $\nabla F_{lin}(\mathbf{0})^\top (\mathbf{0} - \mathbf{w}^*) \geq F_{lin}(\mathbf{0}) - F_{lin}(\mathbf{w}^*)$ , and therefore

$$\|\nabla F_{lin}(\mathbf{0})\| \geq \frac{F_{lin}(\mathbf{0}) - F_{lin}(\mathbf{w}^*)}{\|\mathbf{w}^*\|} = \frac{F(\mathbf{0}, V, \theta) - F_{lin}(\mathbf{w}^*)}{\|\mathbf{w}^*\|}$$

for any  $V, \theta$ . Combining this with Eq. (13) and Eq. (12), and using the shorthand  $F_\theta$  for  $F_\theta(\mathbf{0}, V)$ , we get overall that

$$\|\nabla F_\theta\| + \|V\| \sqrt{|\lambda_{\min}(\nabla^2 F_\theta(\mathbf{0}, V))| \cdot \left\| \frac{\partial^2}{\partial \mathbf{w}^2} F_\theta(\mathbf{0}, V) \right\| + \lambda_{\min}(\nabla^2 F_\theta(\mathbf{0}, V))^2} \geq \frac{F(\mathbf{0}, V, \theta) - F_{lin}(\mathbf{w}^*)}{\|\mathbf{w}^*\|}$$

as required.

#### A.4 Proof of Thm. 3

Letting  $\mathbf{w}^*$  be a minimizer of  $F_{lin}$  over  $\{\mathbf{w} : \|\mathbf{w}\| \leq r\}$ , and using the shorthand  $F_\theta$  for  $F_\theta(\mathbf{0}, V)$ , we have by Thm. 2 and the assumption in our theorem statement that  $\lambda_{\min}(\nabla^2 F_\theta) \leq 0$  that

$$\begin{aligned} F(\mathbf{0}, V, \theta) &\leq F_{lin}(\mathbf{w}^*) + r \left( \|\nabla F_\theta\| + b\sqrt{-\mu_1 \lambda_{\min}(\nabla^2 F_\theta)} + \lambda_{\min}(\nabla^2 F_\theta)^2 \right) \\ &\leq F_{lin}(\mathbf{w}^*) + r \left( \|\nabla F_\theta\| + b\sqrt{-\lambda_{\min}(\nabla^2 F_\theta)} \cdot \sqrt{\mu_1 - \lambda_{\min}(\nabla^2 F_\theta)} \right) \\ &\leq F_{lin}(\mathbf{w}^*) + r \left( \|\nabla F_\theta\| + b\sqrt{-\lambda_{\min}(\nabla^2 F_\theta)} \cdot \sqrt{\mu_1 + \mu_1} \right) \\ &\leq F_{lin}(\mathbf{w}^*) + r \left( \|\nabla F_\theta\| + \sqrt{2}b\sqrt{-\mu_1 \lambda_{\min}(\nabla^2 F_\theta)} \right). \end{aligned}$$

This inequality refers to  $F$  at the point  $(\mathbf{0}, V, \theta)$ . By the Lipschitz assumptions in our theorem, it implies that for any  $\mathbf{w}$  such that  $\|\mathbf{w}\| \leq \delta$  for some  $\delta > 0$ ,

$$F(\mathbf{w}, V, \theta) \leq F_{lin}(\mathbf{w}^*) + \mu_0 \delta + r \left( \|\nabla F_\theta(\mathbf{w}, V)\| + \delta \mu_1 + \sqrt{2}b\sqrt{-\mu_1 \lambda_{\min}(\nabla^2 F_\theta(\mathbf{0}, V))} \right). \quad (14)$$

On the other hand, by Thm. 1, for any  $\mathbf{w}$  such that  $\|\mathbf{w}\| > \delta$ , we have

$$F(\mathbf{w}, V, \theta) \leq F_{lin}(\mathbf{w}^*) + \|\nabla F_\theta(\mathbf{w}, V, \theta)\| \cdot \sqrt{2b^2 + r^2 \left( 2 + \frac{b^2}{\delta^2} \right)}. \quad (15)$$

Now, let  $(\mathbf{w}, V, \theta)$  be an  $\epsilon$ -SOPSP (namely,  $\|\nabla F_\theta(\mathbf{w}, V)\| \leq \epsilon$  and  $\lambda_{\min}(\nabla^2 F_\theta(\mathbf{w}, V)) \geq -\sqrt{\mu_2 \epsilon}$ ), and note that by the Lipschitz assumptions and Thm. 2,

$$0 \geq \lambda_{\min}(\nabla^2 F_\theta(\mathbf{0}, V)) \geq \lambda_{\min}(\nabla^2 F_\theta(\mathbf{w}, V) - \mu_2 \|\mathbf{w}\|) \geq -\sqrt{\mu_2 \epsilon} - \mu_2 \|\mathbf{w}\|.$$

Combining this with Eq. (14) and Eq. (15), we get that for any  $\delta$ , if  $(\mathbf{w}, V, \theta)$  is an  $\epsilon$ -SOPSP, then

$$\begin{aligned} F(\mathbf{w}, V, \theta) &\leq F_{lin}(\mathbf{w}^*) \\ &\quad + \max \left\{ \mu_0 \delta + r \left( \epsilon + \delta \mu_1 + \sqrt{2}b\sqrt{\mu_1(\sqrt{\mu_2 \epsilon} + \delta \mu_2)} \right), \right. \\ &\quad \left. \epsilon \sqrt{2b^2 + r^2 \left( 2 + \frac{b^2}{\delta^2} \right)} \right\}. \end{aligned}$$

In particular, if we pick  $\delta = \sqrt{\epsilon}$ , we get

$$\begin{aligned} F(\mathbf{w}, V, \theta) &\leq F_{lin}(\mathbf{w}^*) \\ &\quad + \max \left\{ \mu_0 \sqrt{\epsilon} + r \left( \epsilon + \mu_1 \sqrt{\epsilon} + \sqrt{2}b\sqrt{\mu_1 \sqrt{\epsilon}(\sqrt{\mu_2} + \mu_2)} \right), \right. \\ &\quad \left. \sqrt{2b^2 \epsilon^2 + r^2 (2\epsilon^2 + b^2 \epsilon)} \right\}. \end{aligned}$$

Simplifying the above, the right-hand side can be bounded by

$$F_{lin}(\mathbf{w}^*) + (\epsilon + \sqrt{\epsilon} + \sqrt[4]{\epsilon}) \cdot \text{poly}(b, r, \mu_0, \mu_1, \mu_2).$$

Since  $\max\{\epsilon, \sqrt[4]{\epsilon}\} \geq \sqrt{\epsilon}$  for any  $\epsilon \geq 0$ , the result follows.

#### A.5 Proof of Thm. 4

Consider any fixed sequence of sampled examples  $(\mathbf{x}_1, y_1), (\mathbf{x}_2, y_2), \dots$ . These induce our algorithm to produce a fixed series of iterates  $(\mathbf{w}_1, \mathbf{v}_1, \theta_1), (\mathbf{w}_2, \mathbf{v}_2, \theta_2), \dots$ . For any  $t$ , define the function

$$g_t((\mathbf{w}, \mathbf{v})) := \ell(\mathbf{w}^\top \mathbf{x}_t + \mathbf{v}^\top f_{\theta_t}(\mathbf{x}_t); y_t), \quad (16)$$

where we view  $(\mathbf{w}, \mathbf{v})$  as one long vector.

Our first key observation is the following: Our stochastic gradient descent algorithm produces iterates  $(\mathbf{w}_t, \mathbf{v}_t)$  which are identical to those produced by the updates

$$(\mathbf{w}_{t+1}, \mathbf{v}_{t+1}) = \Pi_{\mathcal{M}_1}((\mathbf{w}_t, \mathbf{v}_t) - \eta \nabla g_t((\mathbf{w}_t, \mathbf{v}_t))) , \quad (17)$$

where  $(\mathbf{w}_1, \mathbf{v}_1) \in \mathcal{M}_1$ . This follows from the fact that  $\nabla g_t((\mathbf{w}, \mathbf{v})) = \frac{\partial}{\partial(\mathbf{w}, \mathbf{v})} h_t(\mathbf{w}, \mathbf{v}, \theta_t)$  at  $(\mathbf{w}, \mathbf{v}) = (\mathbf{w}_t, \mathbf{v}_t)$ , and that the projection of  $(\mathbf{w}, \mathbf{v}, \theta)$  on the product set  $\mathcal{M} = \mathcal{M}_1 \times \mathcal{M}_2$  is equivalent to separately projecting  $(\mathbf{w}, \mathbf{v})$  on  $\mathcal{M}_1$  and  $\theta$  on  $\mathcal{M}_2$ .

Our second key observation is that the iterates as defined in Eq. (17) are identical to the iterates produced by an *online* gradient descent algorithm (with step size  $\eta$ ) with respect to the sequence of functions  $g_1, g_2, \dots$  [Zinkevich, 2003, Shalev-Shwartz, 2012, Hazan, 2016]. In particular, the following theorem is well-known (see references above):

**Theorem 5.** *Let  $g_1, \dots, g_T$  be a sequence of convex, differentiable,  $l$ -Lipschitz functions over a closed convex subset  $\mathcal{X}$  of Euclidean space, such that  $\mathcal{X} \subseteq \{\mathbf{x} : \|\mathbf{x}\| \leq b\}$ . Then if we pick  $\mathbf{x}_1 \in \mathcal{X}$  and define  $\mathbf{x}_{t+1} = \Pi_{\mathcal{X}}(\mathbf{x}_t - \eta \nabla g_t(\mathbf{x}_t))$  for  $t = 1, \dots, T$ , using any  $\eta = \Theta(b/(l\sqrt{T}))$ , then*

$$\forall \mathbf{x} \in \mathcal{X}, \quad \frac{1}{T} \sum_{t=1}^T g_t(\mathbf{x}_t) - \frac{1}{T} \sum_{t=1}^T g_t(\mathbf{x}) \leq \mathcal{O}\left(\frac{bl}{\sqrt{T}}\right).$$

In particular, running the gradient descent updates on any sequence of convex Lipschitz functions  $g_1, g_2, \dots$  implies that the average of  $g_t(\mathbf{x}_t)$  is not much higher than the minimal value of  $\frac{1}{T} \sum_{t=1}^T g_t(\mathbf{x})$  over  $\mathbf{x} \in \mathcal{X}$ . We now argue that this bound is directly applicable to the functions  $g_t$  defined in Eq. (16), over the domain  $\mathcal{M}_1$ : Indeed, since  $\ell$  is convex and assumed to be  $l$ -Lipschitz in  $(\mathbf{w}, \mathbf{v})$ , each function  $g_t$  is also convex and  $l$ -Lipschitz. Moreover, the elements in  $\mathcal{M}_1$  (viewed as one long vector) are assumed to have an Euclidean norm of at most  $b$ , and the updates as defined in Eq. (17) are the same as in Thm. 5. Therefore, applying the theorem, we get

$$\forall (\mathbf{w}, \mathbf{v}) \in \mathcal{M}_1, \quad \frac{1}{T} \sum_{t=1}^T g_t((\mathbf{w}_t, \mathbf{v}_t)) - \frac{1}{T} \sum_{t=1}^T g_t((\mathbf{w}, \mathbf{v})) \leq \mathcal{O}\left(\frac{bl}{\sqrt{T}}\right).$$

We emphasize that this result holds *deterministically* regardless of how the examples  $(\mathbf{x}_t, y_t)$  are sampled. Slightly rearranging and plugging back the definition of  $g_t$ , we get that

$$\forall (\mathbf{w}, \mathbf{v}) \in \mathcal{M}_1, \quad \frac{1}{T} \sum_{t=1}^T (\ell(\mathbf{w}_t^\top \mathbf{x}_t + \mathbf{v}_t^\top f_{\theta_t}(\mathbf{x}_t); y_t) - \ell(\mathbf{w}^\top \mathbf{x}_t + \mathbf{v}^\top f_{\theta_t}(\mathbf{x}_t); y_t)) \leq \mathcal{O}\left(\frac{bl}{\sqrt{T}}\right).$$

In particular, considering any  $\mathbf{w}$  such that  $(\mathbf{w}, \mathbf{0}) \in \mathcal{M}_1$ , we get that

$$\frac{1}{T} \sum_{t=1}^T (\ell(\mathbf{w}_t^\top \mathbf{x}_t + \mathbf{v}_t^\top f_{\theta_t}(\mathbf{x}_t); y_t) - \ell(\mathbf{w}^\top \mathbf{x}_t; y_t)) \leq \mathcal{O}\left(\frac{bl}{\sqrt{T}}\right). \quad (18)$$

Again, this inequality holds deterministically. Now, note that each  $(\mathbf{x}_t, y_t)$  is a fresh sample, independent of the history up to round  $t$ , and conditioned on this history, the expectation of  $\ell(\mathbf{w}_t^\top \mathbf{x} + \mathbf{v}_t^\top f_{\theta_t}(\mathbf{x}_t); y_t) - \ell(\mathbf{w}^\top \mathbf{x}_t; y_t)$  (over  $(\mathbf{x}_t, y_t)$ ) equals  $F(\mathbf{w}_t, \mathbf{v}_t, \theta_t) - F_{lin}(\mathbf{w})$ . Therefore,

$$(F(\mathbf{w}_t, \mathbf{v}_t, \theta_t) - F_{lin}(\mathbf{w})) - (\ell(\mathbf{w}_t^\top \mathbf{x} + \mathbf{v}_t^\top f_{\theta_t}(\mathbf{x}_t); y_t) - \ell(\mathbf{w}^\top \mathbf{x}_t; y_t))$$

is a martingale difference sequence. Moreover, we assume that the losses  $\ell$  are bounded by  $r$ , so by Azuma's inequality, with probability at least  $1 - \delta$ , the average of the expression above over  $t = 1, \dots, T$  is at most  $\mathcal{O}(r\sqrt{\log(1/\delta)/T})$ . Combining this with Eq. (18), we get that with probability at least  $1 - \delta$ ,

$$\frac{1}{T} \sum_{t=1}^T (F(\mathbf{w}_t, \mathbf{v}_t, \theta_t) - F_{lin}(\mathbf{w})) \leq \mathcal{O}\left(\frac{bl}{\sqrt{T}} + r\sqrt{\frac{\log(1/\delta)}{T}}\right).$$

Rearranging this, we get

$$\frac{1}{T} \sum_{t=1}^T F(\mathbf{w}_t, \mathbf{v}_t, \theta_t) \leq F_{lin}(\mathbf{w}) + \mathcal{O}\left(\frac{bl + r\sqrt{\log(1/\delta)}}{\sqrt{T}}\right).$$

Since the left-hand side is an average over  $T$  terms, at least one of those terms must be upper bounded by the right-hand side, so there exists some  $t$  such that

$$F(\mathbf{w}_t, \mathbf{v}_t, \theta_t) \leq F_{lin}(\mathbf{w}) + \mathcal{O}\left(\frac{bl + r\sqrt{\log(1/\delta)}}{\sqrt{T}}\right).$$

Finally, since this holds for any fixed  $\mathbf{w}$  such that  $(\mathbf{w}, \mathbf{0}) \in \mathcal{M}_1$ , we can choose the one minimizing the right hand side, from which the result follows.

## B Vector-Valued Networks

In our paper, we focused on the case of neural networks with scalar-valued outputs, and losses over scalar values. However, for tasks such as multi-class classification, it is common to use networks with vector-valued outputs  $\mathbf{p}$  (representing a score for each possible class), and losses  $\ell(\mathbf{p}, \mathbf{y})$  taking as input vector values (for example, the cross-entropy loss). Thus, it is natural to ask whether our results can be extended to such a setting.

In this setting, our objective function from Eq. (2) takes the form

$$F(W, V, \theta) = \mathbb{E}_{\mathbf{x}, \mathbf{y}} [\ell(W(\mathbf{x} + Vf_\theta(\mathbf{x})); \mathbf{y})],$$

where  $W$  is a matrix, and as before, we define

$$F_\theta(W, V) := F(W, V, \theta)$$

where  $\theta$  is considered fixed. Using a similar proof technique, it is possible to prove a generalization of Thm. 1 for this case:

**Theorem 6.** *Suppose that  $F$  is defined as above, where  $\ell$  is differentiable and convex in its first argument. Then at any point  $(W, V, \theta)$ , for which  $W$  has full row rank and minimal singular value  $s_{\min}(W) > 0$ , it holds that*

$$\|\nabla F_\theta(W, V)\| \geq \frac{F(W, V, \theta) - F_{lin}(W^*)}{\sqrt{2\|W\|_{Fr}^2 + \|W^*\|_{Fr}^2 \left(2 + \frac{\|V\|^2}{s_{\min}(W)^2}\right)}}.$$

*Proof.* The proof proceeds in the same manner as in Thm. 1 (where  $W$  was a vector). We will need the following key lemma, whose proof is provided below:

**Lemma 3.** *Fix some  $W, V$  and a matrix  $W^*$  of the same size as  $W$ . Define the matrix*

$$G = (W - W^*; W^\top(WW^\top)^{-1}W^*V).$$

*Then*

$$\langle \text{vec}(G), \nabla F_\theta(W, V) \rangle \geq F(W, V, \theta) - F_{lin}(W^*).$$

By Lemma 3 and Cauchy-Schwartz, we have

$$\|G\|_{Fr} \cdot \|\nabla F_\theta(W, V)\| \geq F(W, V, \theta) - F(W^*, \mathbf{0}, \theta).$$

Dividing both sides by  $\|G\|_{Fr}$ , and using the definition of  $G$ , we get that

$$\|\nabla F_\theta(W, V)\| \geq \frac{F(W, V, \theta) - F_{lin}(W^*)}{\sqrt{\|W - W^*\|_{Fr}^2 + \|W^\top(WW^\top)^{-1}W^*V\|_{Fr}^2}} \quad (19)$$

As in the proof of Thm. 1, we can simplify this bound by upper bounding the denominator. Using the facts that  $\|AB\| \leq \|A\| \cdot \|B\|$ , that  $\|AB\|_{Fr} \leq \|A\| \cdot \|B\|_{Fr}$ , and that  $\|AB\|_{Fr} \leq \|A\|_{Fr} \|B\|$ , this denominator is at most

$$\sqrt{\|W - W^*\|_{Fr}^2 + (\|W^\top(WW^\top)^{-1}\| \cdot \|W^*\|_{Fr} \|V\|)^2}. \quad (20)$$

It is easily verified that if  $USV^\top$  is the SVD decomposition of  $W$ , then  $W^\top(WW^\top)^{-1}$  equals  $VS(SS)^{-1}U^\top$ . Since  $V, U$  are orthogonal, it follows that  $\|W(WW^\top)^{-1}\| = \|S(SS)^{-1}\| = s_{\min}(W)^{-1}$ , where  $s_{\min}(W)$  is the smallest singular value of  $W$ . Moreover, we have  $\|W - W^*\|_{Fr}^2 \leq 2\|W\|_{Fr}^2 + 2\|W^*\|_{Fr}^2$ . Therefore, Eq. (20) is at most

$$\sqrt{2\|W\|_{Fr}^2 + 2\|W^*\|_{Fr}^2 + (s_{\min}(W)^{-1}\|W^*\|_{Fr}\|V\|)^2}.$$

Slightly simplifying and plugging back into Eq. (19), the result follows.  $\square$



*Proof of Lemma 3.* To simplify notation, let  $\mathbf{d}_\ell$  denote the (vector-valued) gradient of  $\ell$  with respect to its first argument at the point  $W(\mathbf{x} + Vf_\theta(\mathbf{x}))$  and  $\mathbf{y}$ . For any  $i, j$ , it is easily verified that

$$\frac{\partial}{\partial W_{i,j}} F(W, V, \theta) = \mathbb{E}_{\mathbf{x}, \mathbf{y}} [(\mathbf{d}_\ell)_i(\mathbf{x} + Vf_\theta(\mathbf{x}))_j] ,$$

from which it follows that

$$\frac{\partial}{\partial W} F(W, V, \theta) = \mathbb{E}_{\mathbf{x}, \mathbf{y}} [\mathbf{d}_\ell(\mathbf{x} + Vf_\theta(\mathbf{x}))^\top] ,$$

where we write the partial derivative in matrix form. Therefore, we have

$$\begin{aligned} \left\langle \text{vec}(W - W^*), \text{vec} \left( \frac{\partial}{\partial W} F(W, V, \theta) \right) \right\rangle &= \text{trace} \left( (W - W^*)^\top \frac{\partial}{\partial W} F(W, V, \theta) \right) \\ &= \mathbb{E}_{\mathbf{x}, \mathbf{y}} [\text{trace} ((W - W^*)^\top \mathbf{d}_\ell(\mathbf{x} + Vf_\theta(\mathbf{x}))^\top)] \\ &= \mathbb{E}_{\mathbf{x}, \mathbf{y}} [\text{trace} ((\mathbf{x} + Vf_\theta(\mathbf{x}))^\top (W - W^*)^\top \mathbf{d}_\ell)] \\ &= \mathbb{E}_{\mathbf{x}, \mathbf{y}} [\mathbf{d}_\ell^\top (W - W^*)(\mathbf{x} + Vf_\theta(\mathbf{x}))] , \end{aligned} \quad (21)$$

where we used the facts that  $\text{trace}(ABC) = \text{trace}(CAB)$  and  $\text{trace}(A) = \text{trace}(A^\top)$ .

Proceeding in a similar fashion, it is straightforward to verify that

$$\frac{\partial}{\partial V_{i,j}} F(W, V, \theta) = \mathbb{E}_{\mathbf{x}, \mathbf{y}} [(\mathbf{d}_\ell)^\top W_i(f_\theta(\mathbf{x}))_j]$$

(where  $W_i$  is the  $i$ -th column of  $W$ ), and therefore

$$\frac{\partial}{\partial V} F(W, V, \theta) = \mathbb{E}_{\mathbf{x}, \mathbf{y}} [W^\top (\mathbf{d}_\ell) f_\theta(\mathbf{x})^\top] .$$

As a result,

$$\begin{aligned} \left\langle \text{vec}(W^\top (WW^\top)^{-1} W^* V), \text{vec} \left( \frac{\partial}{\partial V} F(W, V, \theta) \right) \right\rangle &= \text{trace} \left( (W^\top (WW^\top)^{-1} W^* V)^\top \frac{\partial}{\partial V} F(W, V, \theta) \right) \\ &= \mathbb{E}_{\mathbf{x}, \mathbf{y}} [\text{trace} ((W^* V)^\top (WW^\top)^{-1} WW^\top (\mathbf{d}_\ell) f_\theta(\mathbf{x})^\top)] \\ &= \mathbb{E}_{\mathbf{x}, \mathbf{y}} [\text{trace} (f_\theta(\mathbf{x})^\top (W^* V)^\top (\mathbf{d}_\ell))] \\ &= \mathbb{E}_{\mathbf{x}, \mathbf{y}} [(\mathbf{d}_\ell)^\top W^* V f_\theta(\mathbf{x})] . \end{aligned} \quad (22)$$

Summing Eq. (21) and Eq. (22), and recalling the definition of  $G$ , it follows that

$$\begin{aligned} \langle \text{vec}(G), \nabla F_\theta(W, V) \rangle &= \left\langle \text{vec}(W - W^*), \text{vec} \left( \frac{\partial}{\partial W} F(W, V, \theta) \right) \right\rangle + \left\langle \text{vec}(W^\top (WW^\top)^{-1} W^* V), \text{vec} \left( \frac{\partial}{\partial V} F(W, V, \theta) \right) \right\rangle \\ &= \mathbb{E}_{\mathbf{x}, \mathbf{y}} [\mathbf{d}_\ell^\top (W - W^*)(\mathbf{x} + Vf_\theta(\mathbf{x}))] + \mathbb{E}_{\mathbf{x}, \mathbf{y}} [(\mathbf{d}_\ell)^\top W^* V f_\theta(\mathbf{x})] \\ &= \mathbb{E}_{\mathbf{x}, \mathbf{y}} [(\mathbf{d}_\ell)^\top (W(\mathbf{x} + Vf_\theta(\mathbf{x})) - W^* \mathbf{x})] . \end{aligned}$$

Recalling that  $\mathbf{d}_\ell$  is the gradient of  $\ell$  with respect to its first argument when it equals  $W(\mathbf{x} + Vf_\theta(\mathbf{x}))$ , it follows by convexity of  $\ell$  that the expression above is lower bounded by

$$\mathbb{E}_{\mathbf{x}, \mathbf{y}} [\ell(W(\mathbf{x} + Vf_\theta(\mathbf{x})); \mathbf{y}) - \ell(W^* \mathbf{x}; \mathbf{y})] = F(W, V, \theta) - F_{lin}(W^*) .$$

□

This theorem already establishes that our objective in the vector-valued case has no stationary point  $(W, V, \theta)$  (with respect to  $(W, V)$ ) with values above  $F_{lin}(W^*)$ , except possibly when  $W$  is not full row rank, or  $s_{\min}(W) = 0$ . To analyze those cases, one would need an analog of Thm. 2, but unfortunately it is currently unclear how to prove such a result. We leave this question to future research.

Finally, we note that it is straightforward to derive a vector-valued version of Thm. 4 (using stochastic gradient descent over the matrices  $W, V$  instead of  $\mathbf{w}, \mathbf{v}$ ), using a virtually identical proof.
